# Supplementary material
Source: ML conference proceedings conference paper supplement (https://proceedings.mlr.press/v216/szyc23a.html)
Supplement: Supplementary file 1 [file szyc23a-supp.pdf]

---

# Why Out-of-Distribution Detection Experiments Are Not Reliable - Subtle Experimental Details Muddle the OOD Detector Rankings (Supplementary Material)

---

Kamil Szy<sup>1</sup>

Tomasz Walkowiak<sup>1</sup>

Henryk Maciejewski<sup>1</sup>

<sup>1</sup>Faculty of Information and Communication Technology, Wrocław University of Science and Technology, Wrocław, Poland

## A ADDITIONAL SIMULATION RESULTS FOR ARCHITECTURE FEATURES

Additional simulation results (additional metrics: DTACC, TNR at TPR 95%, and AUPR) for Table 2 of the main paper showing the instability of OOD detection metrics for three different variations of CNN architectures (ResNet-101 and ResNet-110). The results are presented in Tables 1,2, and 3. The message from the results presented here is similar to that from Table 2 of the main paper, that changing the details of the architecture leads to different winning OOD methods and can cause large changes in the OOD detection quality metrics. This is especially visible for MaxLogits (ML) and FreeEnergy (FE). Moreover, the winning methods for AUC, DTACC, and AUPR are almost the same (these metrics select the same winning method for a given architecture and task), but the results for TNR are very different.

Table 1: DTACC results for the OOD detection instability caused by the architecture features. Additional results to those presented in Table 2 of the main paper.

| Type      | ACC   | KNN          | Mah          | ML    | MSP   | LOF <sub>C</sub> | LOF <sub>E</sub> | FE           |
|-----------|-------|--------------|--------------|-------|-------|------------------|------------------|--------------|
| SVHN      |       |              |              |       |       |                  |                  |              |
| type-0    | 94.50 | <b>86.05</b> | 83.40        | 82.64 | 83.69 | 79.69            | 79.80            | 82.64        |
| type-1    | 93.64 | <b>87.14</b> | 82.07        | 74.44 | 79.73 | 85.31            | 85.11            | 74.41        |
| type-2    | 92.91 | 82.84        | <b>83.30</b> | 66.53 | 72.27 | 81.97            | 81.16            | 66.43        |
| CIFAR-100 |       |              |              |       |       |                  |                  |              |
| type-0    | 94.50 | 79.38        | 77.98        | 81.28 | 81.33 | 72.31            | 70.23            | <b>81.31</b> |
| type-1    | 93.64 | <b>81.39</b> | 80.68        | 80.16 | 80.12 | 79.63            | 78.98            | 80.17        |
| type-2    | 92.91 | <b>79.75</b> | 78.19        | 77.82 | 79.14 | 76.21            | 74.91            | 77.80        |

## B ADDITIONAL SIMULATION RESULTS FOR INITIAL SEEDS

Additional simulation results (DTACC, TNR, and AUPR metrics) in the experiments reported in the main paper in Table 3 are shown here in Tables 4,5, and 6. We analyze the instability of OOD detection decisions due to the random seeds used during training. We find that the initial seed has a small effect on the close-set accuracy but causes a large variation in all OOD detection metrics used. Moreover, the ranking of the methods is significantly changed regardless of the OOD detection method used.

Table 2: TNR at TPR 95% results for the OOD detection instability caused by the architecture features. Additional results to those presented in Table 2 of the main paper.

| Type      | ACC   | KNN          | Mah          | ML    | MSP   | LOF <sub>C</sub> | LOF <sub>E</sub> | FE           |
|-----------|-------|--------------|--------------|-------|-------|------------------|------------------|--------------|
| SVHN      |       |              |              |       |       |                  |                  |              |
| type-0    | 94.50 | 52.15        | <b>53.67</b> | 40.08 | 34.27 | 42.04            | 43.21            | 39.73        |
| type-1    | 93.64 | <b>57.57</b> | 49.91        | 18.72 | 27.59 | 43.70            | 50.43            | 17.85        |
| type-2    | 92.91 | 36.00        | 38.87        | 18.96 | 17.17 | 53.12            | <b>49.01</b>     | 19.27        |
| CIFAR-100 |       |              |              |       |       |                  |                  |              |
| type-0    | 94.50 | 35.00        | 33.01        | 45.89 | 34.99 | 21.20            | 20.44            | <b>45.98</b> |
| type-1    | 93.64 | 42.14        | <b>42.28</b> | 41.83 | 32.70 | 41.09            | 41.48            | 42.10        |
| type-2    | 92.91 | 36.85        | 33.22        | 38.02 | 29.39 | 32.81            | 30.19            | <b>38.60</b> |

Table 3: AUPR results for the OOD detection instability caused by the architecture features. Additional results to those presented in Table 2 of the main paper.

| Type      | ACC   | KNN          | Mah   | ML    | MSP   | LOF <sub>C</sub> | LOF <sub>E</sub> | FE           |
|-----------|-------|--------------|-------|-------|-------|------------------|------------------|--------------|
| SVHN      |       |              |       |       |       |                  |                  |              |
| type-0    | 94.50 | <b>92.05</b> | 91.12 | 87.98 | 88.29 | 87.13            | 87.18            | 87.95        |
| type-1    | 93.64 | <b>93.43</b> | 89.97 | 77.71 | 83.40 | 90.85            | 91.49            | 77.49        |
| type-2    | 92.91 | 88.42        | 88.96 | 67.26 | 73.70 | <b>89.92</b>     | 88.85            | 67.23        |
| CIFAR-100 |       |              |       |       |       |                  |                  |              |
| type-0    | 94.50 | 85.47        | 84.27 | 87.50 | 86.70 | 77.53            | 75.51            | <b>87.55</b> |
| type-1    | 93.64 | <b>88.12</b> | 87.45 | 85.82 | 85.27 | 86.13            | 85.24            | 85.85        |
| type-2    | 92.91 | <b>86.23</b> | 84.41 | 82.25 | 83.00 | 82.49            | 81.21            | 82.29        |

## C ADDITIONAL SIMULATION RESULTS FOR OOD EXAMPLE SELECTION

Additional simulation results (ACC, DTACC, TNR, and AUPR metrics) for Table 4 of the main paper (we also show here the rank of the methods). We analyze the instability of the OOD detection metrics as a result of the random selection of OOD examples (necessary to keep the 1:1 ratio between ID and OOD data). The results are presented in Tables 7,8,9, and 10. It can be seen that the random selection of OOD examples has almost no influence on the method ranks, regardless of the reported metric.

## D ADDITIONAL SIMULATION RESULTS FOR TRAIN-TEST SPLIT

Additional simulation results (DTACC, TNR, and AUPR metrics) for Table 5 of the main paper. We analyze the instability of the OOD detection metrics as a result of the train-test split for close-set task. The results are presented in Tables 11, 12, and 13. Similarly to the initial seeds of the nearest-neighbor training, the train-test split has a small effect on the nearest-neighbor accuracy, but causes a large variation in all OOD detection metrics used. Furthermore, the ranking of the methods changes significantly regardless of the OOD detection method used.

## E ADDITIONAL SIMULATION RESULTS FOR AUGMENTATION STRATEGIES

Additional simulation results (DTACC, TNR, and AUPR metrics) for Table 6 of the main paper. We analyze the instability of the OOD detection metrics as a result of the augmentation strategy used. The results are presented in Tables 14, 15, and

Table 4: DTACC results for the OOD detection instability caused by the different random seeds used during training. Additional results to those presented in Table 3 of the main paper.

| MobileNet with closed set ACC = 74.75±0.31 |                   |       |           |       |                       |       |           |       |  |
|--------------------------------------------|-------------------|-------|-----------|-------|-----------------------|-------|-----------|-------|--|
| Method                                     | CIFAR-100 vs SVHN |       |           |       | CIFAR-100 vs CIFAR-10 |       |           |       |  |
|                                            | AUPR              |       | Rank      |       | AUPR                  |       | Rank      |       |  |
|                                            | mean±std          | delta | mean±std  | range | mean±std              | delta | mean±std  | range |  |
| KNN                                        | 64.98±6.95        | 22.21 | 5.50±0.92 | 3-6   | 60.62±1.54            | 4.66  | 4.90±0.54 | 4-6   |  |
| Mah                                        | 69.67±7.07        | 19.88 | 4.50±1.28 | 2-6   | 57.45±1.96            | 7.18  | 5.80±0.60 | 4-6   |  |
| ML                                         | 81.59±4.88        | 18.64 | 1.50±0.92 | 1-4   | 76.53±0.57            | 2.03  | 0.00±0.00 | 0-0   |  |
| MSP                                        | 77.58±4.42        | 16.10 | 3.70±1.00 | 2-6   | 75.69±0.35            | 1.05  | 2.00±0.00 | 2-2   |  |
| LOF <sub>C</sub>                           | 82.04±3.73        | 11.27 | 1.40±1.20 | 0-3   | 64.94±1.77            | 6.02  | 3.00±0.00 | 3-3   |  |
| LOF <sub>E</sub>                           | 74.96±4.18        | 12.79 | 3.50±1.20 | 1-6   | 62.37±1.30            | 5.06  | 4.30±0.46 | 4-5   |  |
| FE                                         | 82.02±5.08        | 19.46 | 0.90±1.51 | 0-5   | 76.40±0.63            | 2.30  | 1.00±0.00 | 1-1   |  |

  

| ResNet with closed set ACC = 92.73±0.27 |                  |       |           |       |                       |       |           |       |  |
|-----------------------------------------|------------------|-------|-----------|-------|-----------------------|-------|-----------|-------|--|
| Method                                  | CIFAR-10 vs SVHN |       |           |       | CIFAR-10 vs CIFAR-100 |       |           |       |  |
|                                         | AUPR             |       | Rank      |       | AUPR                  |       | Rank      |       |  |
|                                         | mean±std         | delta | mean±std  | range | mean±std              | delta | mean±std  | range |  |
| KNN                                     | 74.46±13.32      | 44.52 | 3.90±1.70 | 1-6   | 62.31±7.34            | 21.98 | 4.20±0.98 | 3-6   |  |
| Mah                                     | 77.13±6.45       | 23.18 | 4.20±1.08 | 2-6   | 62.08±6.30            | 20.44 | 3.60±0.49 | 3-4   |  |
| ML                                      | 82.92±1.53       | 4.90  | 1.80±1.40 | 0-4   | 87.07±0.49            | 1.47  | 1.00±0.00 | 1-1   |  |
| MSP                                     | 83.83±1.41       | 4.00  | 0.90±1.04 | 0-3   | 83.78±0.63            | 1.86  | 2.00±0.00 | 2-2   |  |
| LOF <sub>C</sub>                        | 69.58±6.56       | 23.29 | 5.70±0.46 | 5-6   | 57.04±3.34            | 8.96  | 5.70±0.64 | 4-6   |  |
| LOF <sub>E</sub>                        | 81.83±7.37       | 29.18 | 1.70±1.27 | 0-3   | 58.86±3.43            | 11.91 | 4.50±1.02 | 3-6   |  |
| FE                                      | 82.77±1.53       | 4.90  | 2.80±1.40 | 1-5   | 87.11±0.49            | 1.50  | 0.00±0.00 | 0-0   |  |

16. It confirms the conclusions presented in the main paper, i.e., a large impact of augmentation techniques on OOD results, and with SVHN as OOD, almost any OOD method can be considered the best by choosing the appropriate augmentation method.

## F ADDITIONAL SIMULATION RESULTS FOR TEXT BASED OOD

Additional simulation results (DTACC, TNR, and AUPR metrics) for Table 7 of the main paper. We analyze the instability of OOD detection decisions as an effect of different random seeds used during training for text classification based on BERT (transformer-based) representations. The results are presented in Table 17. They confirm the conclusions presented in the main paper that the rank of the OOD method could be selected in almost any order just by peeking at the seed used during training.

Table 5: TNR at TPR 95% results for the OOD detection instability caused by the different random seeds used during training. Additional results to those presented in Table 3 of the main paper.

| MobileNet with closed set ACC = 74.75±0.31 |                   |       |           |       |                       |       |           |       |
|--------------------------------------------|-------------------|-------|-----------|-------|-----------------------|-------|-----------|-------|
| Method                                     | CIFAR-100 vs SVHN |       |           |       | CIFAR-100 vs CIFAR-10 |       |           |       |
|                                            | TNR               |       | Rank      |       | TNR                   |       | Rank      |       |
|                                            | mean±std          | delta | mean±std  | range | mean±std              | delta | mean±std  | range |
| KNN                                        | 7.48±4.74         | 13.48 | 5.90±0.30 | 5-6   | 7.13±0.75             | 2.82  | 4.00±0.77 | 3-5   |
| Mah                                        | 14.20±8.10        | 23.12 | 4.30±1.42 | 1-5   | 5.69±1.32             | 4.91  | 5.60±0.92 | 3-6   |
| ML                                         | 27.34±7.64        | 28.77 | 1.90±0.83 | 1-3   | 18.81±0.72            | 2.25  | 0.20±0.40 | 0-1   |
| MSP                                        | 22.39±4.99        | 18.86 | 3.10±0.70 | 2-4   | 18.07±0.48            | 1.75  | 1.50±0.67 | 0-2   |
| LOF <sub>C</sub>                           | 30.52±6.39        | 22.70 | 0.90±1.22 | 0-3   | 6.83±1.08             | 3.38  | 4.30±1.10 | 3-6   |
| LOF <sub>E</sub>                           | 16.95±7.06        | 24.63 | 3.70±1.27 | 1-6   | 6.87±0.88             | 2.89  | 4.10±0.83 | 3-5   |
| FE                                         | 28.64±8.89        | 33.78 | 1.20±1.47 | 0-5   | 18.35±0.90            | 3.14  | 1.30±0.64 | 0-2   |

  

| ResNet with closed set ACC = 92.73±0.27 |                  |       |           |       |                       |       |           |       |
|-----------------------------------------|------------------|-------|-----------|-------|-----------------------|-------|-----------|-------|
| Method                                  | CIFAR-10 vs SVHN |       |           |       | CIFAR-10 vs CIFAR-100 |       |           |       |
|                                         | TNR              |       | Rank      |       | TNR                   |       | Rank      |       |
|                                         | mean±std         | delta | mean±std  | range | mean±std              | delta | mean±std  | range |
| KNN                                     | 19.29±19.23      | 46.65 | 4.00±2.45 | 1-6   | 10.74±3.22            | 11.39 | 4.50±0.92 | 3-6   |
| Mah                                     | 26.30±10.85      | 39.80 | 3.00±1.34 | 1-5   | 13.53±3.53            | 12.28 | 3.10±0.30 | 3-4   |
| ML                                      | 23.22±3.01       | 9.68  | 2.90±1.14 | 1-4   | 40.19±1.47            | 4.43  | 0.80±0.40 | 0-1   |
| MSP                                     | 25.50±2.19       | 7.50  | 2.30±1.10 | 0-4   | 28.58±1.52            | 4.68  | 2.00±0.00 | 2-2   |
| LOF <sub>C</sub>                        | 17.87±9.01       | 28.28 | 4.40±2.06 | 0-6   | 8.38±1.50             | 3.97  | 5.80±0.40 | 5-6   |
| LOF <sub>E</sub>                        | 37.73±12.18      | 50.00 | 0.40±0.92 | 0-3   | 9.85±1.47             | 4.97  | 4.60±0.49 | 4-5   |
| FE                                      | 22.71±3.16       | 10.65 | 4.00±1.18 | 2-5   | 40.36±1.54            | 4.20  | 0.20±0.40 | 0-1   |

Table 6: AUPR results for the OOD detection instability caused by the different random seeds used during training. Additional results to those presented in Table 3 of the main paper.

| MobileNet with closed set ACC = 74.75±0.31 |                   |       |           |       |                       |       |           |       |
|--------------------------------------------|-------------------|-------|-----------|-------|-----------------------|-------|-----------|-------|
| Method                                     | CIFAR-100 vs SVHN |       |           |       | CIFAR-100 vs CIFAR-10 |       |           |       |
|                                            | AUPR              |       | Rank      |       | AUPR                  |       | Rank      |       |
|                                            | mean±std          | delta | mean±std  | range | mean±std              | delta | mean±std  | range |
| KNN                                        | 64.98±6.95        | 22.21 | 5.50±0.92 | 3-6   | 60.62±1.54            | 4.66  | 4.90±0.54 | 4-6   |
| Mah                                        | 69.67±7.07        | 19.88 | 4.50±1.28 | 2-6   | 57.45±1.96            | 7.18  | 5.80±0.60 | 4-6   |
| ML                                         | 81.59±4.88        | 18.64 | 1.50±0.92 | 1-4   | 76.53±0.57            | 2.03  | 0.00±0.00 | 0-0   |
| MSP                                        | 77.58±4.42        | 16.10 | 3.70±1.00 | 2-6   | 75.69±0.35            | 1.05  | 2.00±0.00 | 2-2   |
| LOF <sub>C</sub>                           | 82.04±3.73        | 11.27 | 1.40±1.20 | 0-3   | 64.94±1.77            | 6.02  | 3.00±0.00 | 3-3   |
| LOF <sub>E</sub>                           | 74.96±4.18        | 12.79 | 3.50±1.20 | 1-6   | 62.37±1.30            | 5.06  | 4.30±0.46 | 4-5   |
| FE                                         | 82.02±5.08        | 19.46 | 0.90±1.51 | 0-5   | 76.40±0.63            | 2.30  | 1.00±0.00 | 1-1   |

  

| ResNet with closed set ACC = 92.73±0.27 |                  |       |           |       |                       |       |           |       |
|-----------------------------------------|------------------|-------|-----------|-------|-----------------------|-------|-----------|-------|
| Method                                  | CIFAR-10 vs SVHN |       |           |       | CIFAR-10 vs CIFAR-100 |       |           |       |
|                                         | AUPR             |       | Rank      |       | AUPR                  |       | Rank      |       |
|                                         | mean±std         | delta | mean±std  | range | mean±std              | delta | mean±std  | range |
| KNN                                     | 74.46±13.32      | 44.52 | 3.90±1.70 | 1-6   | 62.31±7.34            | 21.98 | 4.20±0.98 | 3-6   |
| Mah                                     | 77.13±6.45       | 23.18 | 4.20±1.08 | 2-6   | 62.08±6.30            | 20.44 | 3.60±0.49 | 3-4   |
| ML                                      | 82.92±1.53       | 4.90  | 1.80±1.40 | 0-4   | 87.07±0.49            | 1.47  | 1.00±0.00 | 1-1   |
| MSP                                     | 83.83±1.41       | 4.00  | 0.90±1.04 | 0-3   | 83.78±0.63            | 1.86  | 2.00±0.00 | 2-2   |
| LOF <sub>C</sub>                        | 69.58±6.56       | 23.29 | 5.70±0.46 | 5-6   | 57.04±3.34            | 8.96  | 5.70±0.64 | 4-6   |
| LOF <sub>E</sub>                        | 81.83±7.37       | 29.18 | 1.70±1.27 | 0-3   | 58.86±3.43            | 11.91 | 4.50±1.02 | 3-6   |
| FE                                      | 82.77±1.53       | 4.90  | 2.80±1.40 | 1-5   | 87.11±0.49            | 1.50  | 0.00±0.00 | 0-0   |

Table 7: ACC results for the OOD detection instability caused by random selection of OOD images. Additional results (methods rank added) for experiments reported in Table 4 of the main paper.

| MobileNet        |                   |       |           |       |                       |       |           |       |
|------------------|-------------------|-------|-----------|-------|-----------------------|-------|-----------|-------|
| Method           | CIFAR-100 vs SVHN |       |           |       | CIFAR-100 vs CIFAR-10 |       |           |       |
|                  | AUC               |       | Rank      |       | AUC                   |       | Rank      |       |
|                  | mean±std          | delta | mean±std  | range | mean±std              | delta | mean±std  | range |
| KNN              | 75.56±0.18        | 0.90  | 5.35±0.48 | 5-6   | 60.67±0.22            | 1.14  | 5.00±0.00 | 5-5   |
| Mah              | 75.52±0.20        | 0.87  | 5.65±0.48 | 5-6   | 57.55±0.24            | 1.18  | 6.00±0.00 | 6-6   |
| ML               | 81.72±0.15        | 0.80  | 2.00±0.00 | 2-2   | 76.88±0.18            | 0.85  | 0.00±0.00 | 0-0   |
| MSP              | 78.25±0.18        | 0.87  | 4.00±0.00 | 4-4   | 76.09±0.16            | 0.96  | 2.00±0.00 | 2-2   |
| LOF <sub>C</sub> | 84.31±0.15        | 0.74  | 0.00±0.00 | 0-0   | 68.41±0.20            | 0.94  | 3.00±0.00 | 3-3   |
| LOF <sub>E</sub> | 78.87±0.18        | 0.97  | 3.00±0.00 | 3-3   | 64.31±0.22            | 1.12  | 4.00±0.00 | 4-4   |
| FE               | 81.84±0.14        | 0.80  | 1.00±0.00 | 1-1   | 76.70±0.18            | 0.89  | 1.00±0.00 | 1-1   |
| ResNet           |                   |       |           |       |                       |       |           |       |
| Method           | CIFAR-10 vs SVHN  |       |           |       | CIFAR-10 vs CIFAR-100 |       |           |       |
|                  | AUC               |       | Rank      |       | AUC                   |       | Rank      |       |
|                  | mean±std          | delta | mean±std  | range | mean±std              | delta | mean±std  | range |
| KNN              | 87.80±0.17        | 0.88  | 1.00±0.00 | 1-1   | 59.80±0.27            | 1.50  | 4.00±0.00 | 4-4   |
| Mah              | 85.26±0.18        | 1.02  | 3.00±0.00 | 3-3   | 58.67±0.27            | 1.43  | 5.00±0.00 | 5-5   |
| ML               | 83.88±0.12        | 0.63  | 4.00±0.00 | 4-4   | 87.73±0.13            | 0.69  | 1.00±0.00 | 1-1   |
| MSP              | 86.69±0.11        | 0.53  | 2.00±0.00 | 2-2   | 86.20±0.13            | 0.66  | 2.00±0.00 | 2-2   |
| LOF <sub>C</sub> | 72.08±0.21        | 1.39  | 6.00±0.00 | 6-6   | 55.56±0.23            | 1.28  | 6.00±0.00 | 6-6   |
| LOF <sub>E</sub> | 91.40±0.12        | 0.63  | 0.00±0.00 | 0-0   | 62.73±0.22            | 1.09  | 3.00±0.00 | 3-3   |
| FE               | 83.75±0.12        | 0.62  | 5.00±0.00 | 5-5   | 87.76±0.13            | 0.69  | 0.00±0.00 | 0-0   |

Table 8: DTACC results for the OOD detection instability caused by random selection of OOD images. Additional results for experiments reported in Table 4 of the main paper.

| MobileNet        |                   |       |                        |               |                         |                |                        |               |
|------------------|-------------------|-------|------------------------|---------------|-------------------------|----------------|------------------------|---------------|
| Method           | CIFAR-100 vs SVHN |       |                        |               | CIFAR-100 vs CIFAR-10   |                |                        |               |
|                  | mean $\pm$ std    | delta | Rank<br>mean $\pm$ std | Rank<br>range | DTACC<br>mean $\pm$ std | DTACC<br>delta | Rank<br>mean $\pm$ std | Rank<br>range |
| KNN              | 69.48 $\pm$ 0.17  | 0.82  | 5.01 $\pm$ 0.10        | 5-6           | 58.62 $\pm$ 0.18        | 0.94           | 5.00 $\pm$ 0.00        | 5-5           |
| Mah              | 69.12 $\pm$ 0.17  | 0.81  | 5.99 $\pm$ 0.10        | 5-6           | 56.29 $\pm$ 0.20        | 1.03           | 6.00 $\pm$ 0.00        | 6-6           |
| ML               | 74.77 $\pm$ 0.17  | 0.87  | 2.00 $\pm$ 0.00        | 2-2           | 70.98 $\pm$ 0.17        | 0.94           | 0.11 $\pm$ 0.31        | 0-1           |
| MSP              | 70.86 $\pm$ 0.18  | 0.77  | 4.00 $\pm$ 0.00        | 4-4           | 70.10 $\pm$ 0.16        | 0.76           | 2.00 $\pm$ 0.00        | 2-2           |
| LOF <sub>C</sub> | 76.69 $\pm$ 0.17  | 0.86  | 0.00 $\pm$ 0.00        | 0-0           | 64.54 $\pm$ 0.16        | 0.89           | 3.00 $\pm$ 0.00        | 3-3           |
| LOF <sub>E</sub> | 72.44 $\pm$ 0.18  | 0.75  | 3.00 $\pm$ 0.00        | 3-3           | 61.30 $\pm$ 0.19        | 0.94           | 4.00 $\pm$ 0.00        | 4-4           |
| FE               | 75.08 $\pm$ 0.17  | 0.78  | 1.00 $\pm$ 0.00        | 1-1           | 70.94 $\pm$ 0.18        | 1.03           | 0.89 $\pm$ 0.31        | 0-1           |
| ResNet           |                   |       |                        |               |                         |                |                        |               |
| Method           | CIFAR-10 vs SVHN  |       |                        |               | CIFAR-10 vs CIFAR-100   |                |                        |               |
|                  | mean $\pm$ std    | delta | Rank<br>mean $\pm$ std | Rank<br>range | DTACC<br>mean $\pm$ std | DTACC<br>delta | Rank<br>mean $\pm$ std | Rank<br>range |
| KNN              | 82.23 $\pm$ 0.17  | 0.88  | 1.00 $\pm$ 0.00        | 1-1           | 58.78 $\pm$ 0.21        | 1.02           | 4.04 $\pm$ 0.31        | 3-5           |
| Mah              | 77.90 $\pm$ 0.18  | 1.14  | 3.97 $\pm$ 0.97        | 3-5           | 58.52 $\pm$ 0.21        | 1.10           | 4.93 $\pm$ 0.26        | 4-5           |
| ML               | 77.89 $\pm$ 0.16  | 0.72  | 3.49 $\pm$ 0.50        | 3-4           | 80.44 $\pm$ 0.16        | 0.81           | 0.84 $\pm$ 0.37        | 0-1           |
| MSP              | 80.78 $\pm$ 0.18  | 0.87  | 2.00 $\pm$ 0.00        | 2-2           | 80.05 $\pm$ 0.15        | 0.87           | 2.00 $\pm$ 0.00        | 2-2           |
| LOF <sub>C</sub> | 66.53 $\pm$ 0.21  | 1.31  | 6.00 $\pm$ 0.00        | 6-6           | 54.06 $\pm$ 0.20        | 1.12           | 6.00 $\pm$ 0.00        | 6-6           |
| LOF <sub>E</sub> | 83.99 $\pm$ 0.16  | 0.72  | 0.00 $\pm$ 0.00        | 0-0           | 59.23 $\pm$ 0.21        | 0.93           | 3.03 $\pm$ 0.17        | 3-4           |
| FE               | 77.87 $\pm$ 0.16  | 0.73  | 4.54 $\pm$ 0.50        | 4-5           | 80.46 $\pm$ 0.16        | 0.83           | 0.16 $\pm$ 0.37        | 0-1           |

Table 9: TNR at TPR 95% results for the OOD detection instability caused by random selection of OOD images. Additional results for experiments reported in Table 4 of the main paper.

| MobileNet        |                   |       |                 |       |                       |       |                 |       |
|------------------|-------------------|-------|-----------------|-------|-----------------------|-------|-----------------|-------|
| Method           | CIFAR-100 vs SVHN |       |                 |       | CIFAR-100 vs CIFAR-10 |       |                 |       |
|                  | TNR               |       | Rank            |       | TNR                   |       | Rank            |       |
|                  | mean $\pm$ std    | delta | mean $\pm$ std  | range | mean $\pm$ std        | delta | mean $\pm$ std  | range |
| KNN              | 15.61 $\pm$ 0.30  | 1.71  | 6.00 $\pm$ 0.00 | 6-6   | 6.76 $\pm$ 0.22       | 1.03  | 5.00 $\pm$ 0.00 | 5-5   |
| Mah              | 18.76 $\pm$ 0.37  | 1.86  | 5.00 $\pm$ 0.00 | 5-5   | 5.53 $\pm$ 0.20       | 1.02  | 6.00 $\pm$ 0.00 | 6-6   |
| ML               | 23.86 $\pm$ 0.37  | 1.92  | 1.00 $\pm$ 0.00 | 1-1   | 17.44 $\pm$ 0.36      | 1.93  | 0.34 $\pm$ 0.47 | 0-1   |
| MSP              | 22.64 $\pm$ 0.32  | 1.54  | 2.98 $\pm$ 0.14 | 2-3   | 17.36 $\pm$ 0.40      | 1.84  | 0.71 $\pm$ 0.53 | 0-2   |
| LOF <sub>C</sub> | 35.44 $\pm$ 0.46  | 2.66  | 0.00 $\pm$ 0.00 | 0-0   | 9.20 $\pm$ 0.27       | 1.23  | 3.00 $\pm$ 0.00 | 3-3   |
| LOF <sub>E</sub> | 21.12 $\pm$ 0.36  | 1.76  | 4.00 $\pm$ 0.00 | 4-4   | 7.98 $\pm$ 0.24       | 1.17  | 4.00 $\pm$ 0.00 | 4-4   |
| FE               | 23.29 $\pm$ 0.39  | 1.96  | 2.02 $\pm$ 0.14 | 2-3   | 16.87 $\pm$ 0.34      | 2.07  | 1.95 $\pm$ 0.26 | 0-2   |

  

| ResNet           |                  |       |                 |       |                       |       |                 |       |
|------------------|------------------|-------|-----------------|-------|-----------------------|-------|-----------------|-------|
| Method           | CIFAR-10 vs SVHN |       |                 |       | CIFAR-10 vs CIFAR-100 |       |                 |       |
|                  | TNR              |       | Rank            |       | TNR                   |       | Rank            |       |
|                  | mean $\pm$ std   | delta | mean $\pm$ std  | range | mean $\pm$ std        | delta | mean $\pm$ std  | range |
| KNN              | 46.91 $\pm$ 0.45 | 2.46  | 1.00 $\pm$ 0.00 | 1-1   | 10.59 $\pm$ 0.26      | 1.49  | 4.84 $\pm$ 0.37 | 4-5   |
| Mah              | 39.91 $\pm$ 0.47 | 2.28  | 2.00 $\pm$ 0.00 | 2-2   | 13.63 $\pm$ 0.33      | 1.66  | 3.00 $\pm$ 0.00 | 3-3   |
| ML               | 22.44 $\pm$ 0.38 | 1.82  | 4.00 $\pm$ 0.00 | 4-4   | 41.05 $\pm$ 0.40      | 2.18  | 0.95 $\pm$ 0.22 | 0-1   |
| MSP              | 27.27 $\pm$ 0.42 | 2.43  | 3.00 $\pm$ 0.00 | 3-3   | 29.45 $\pm$ 0.41      | 2.07  | 2.00 $\pm$ 0.00 | 2-2   |
| LOF <sub>C</sub> | 14.08 $\pm$ 0.31 | 1.52  | 6.00 $\pm$ 0.00 | 6-6   | 7.69 $\pm$ 0.21       | 1.13  | 6.00 $\pm$ 0.00 | 6-6   |
| LOF <sub>E</sub> | 59.76 $\pm$ 0.46 | 2.28  | 0.00 $\pm$ 0.00 | 0-0   | 10.95 $\pm$ 0.25      | 1.57  | 4.16 $\pm$ 0.37 | 4-5   |
| FE               | 21.87 $\pm$ 0.36 | 1.70  | 5.00 $\pm$ 0.00 | 5-5   | 41.27 $\pm$ 0.41      | 2.31  | 0.05 $\pm$ 0.22 | 0-1   |



Table 10: AUPR results for the OOD detection instability caused by random selection of OOD images. Additional results for experiments reported in Table 4 of the main paper.

| MobileNet        |                   |       |                 |       |                       |       |                 |       |
|------------------|-------------------|-------|-----------------|-------|-----------------------|-------|-----------------|-------|
| Method           | CIFAR-100 vs SVHN |       |                 |       | CIFAR-100 vs CIFAR-10 |       |                 |       |
|                  | AUPR              |       | Rank            |       | AUPR                  |       | Rank            |       |
|                  | mean $\pm$ std    | delta | mean $\pm$ std  | range | mean $\pm$ std        | delta | mean $\pm$ std  | range |
| KNN              | 74.61 $\pm$ 0.18  | 0.88  | 5.00 $\pm$ 0.00 | 5-5   | 59.54 $\pm$ 0.20      | 1.03  | 5.00 $\pm$ 0.00 | 5-5   |
| Mah              | 74.29 $\pm$ 0.20  | 0.95  | 6.00 $\pm$ 0.00 | 6-6   | 56.80 $\pm$ 0.21      | 1.00  | 6.00 $\pm$ 0.00 | 6-6   |
| ML               | 81.01 $\pm$ 0.15  | 0.78  | 1.32 $\pm$ 0.47 | 1-2   | 75.60 $\pm$ 0.19      | 0.94  | 0.00 $\pm$ 0.00 | 0-0   |
| MSP              | 77.90 $\pm$ 0.17  | 0.92  | 3.61 $\pm$ 0.49 | 3-4   | 75.16 $\pm$ 0.17      | 0.90  | 1.99 $\pm$ 0.10 | 1-2   |
| LOF <sub>C</sub> | 83.69 $\pm$ 0.16  | 0.84  | 0.00 $\pm$ 0.00 | 0-0   | 67.14 $\pm$ 0.20      | 1.00  | 3.00 $\pm$ 0.00 | 3-3   |
| LOF <sub>E</sub> | 77.99 $\pm$ 0.20  | 1.03  | 3.39 $\pm$ 0.49 | 3-4   | 63.04 $\pm$ 0.22      | 1.25  | 4.00 $\pm$ 0.00 | 4-4   |
| FE               | 81.00 $\pm$ 0.15  | 0.80  | 1.68 $\pm$ 0.47 | 1-2   | 75.34 $\pm$ 0.19      | 0.93  | 1.01 $\pm$ 0.10 | 1-2   |

  

| ResNet           |                  |       |                 |       |                       |       |                 |       |
|------------------|------------------|-------|-----------------|-------|-----------------------|-------|-----------------|-------|
| Method           | CIFAR-10 vs SVHN |       |                 |       | CIFAR-10 vs CIFAR-100 |       |                 |       |
|                  | AUPR             |       | Rank            |       | AUPR                  |       | Rank            |       |
|                  | mean $\pm$ std   | delta | mean $\pm$ std  | range | mean $\pm$ std        | delta | mean $\pm$ std  | range |
| KNN              | 83.84 $\pm$ 0.24 | 1.18  | 3.00 $\pm$ 0.00 | 3-3   | 56.83 $\pm$ 0.22      | 1.25  | 4.99 $\pm$ 0.10 | 4-5   |
| Mah              | 84.61 $\pm$ 0.21 | 1.10  | 1.99 $\pm$ 0.10 | 1-2   | 57.25 $\pm$ 0.23      | 1.12  | 4.01 $\pm$ 0.10 | 4-5   |
| ML               | 82.38 $\pm$ 0.13 | 0.72  | 4.00 $\pm$ 0.00 | 4-4   | 86.98 $\pm$ 0.15      | 0.71  | 1.00 $\pm$ 0.00 | 1-1   |
| MSP              | 85.16 $\pm$ 0.15 | 0.77  | 1.01 $\pm$ 0.10 | 1-2   | 84.45 $\pm$ 0.18      | 0.89  | 2.00 $\pm$ 0.00 | 2-2   |
| LOF <sub>C</sub> | 70.68 $\pm$ 0.21 | 1.34  | 6.00 $\pm$ 0.00 | 6-6   | 54.82 $\pm$ 0.21      | 1.10  | 6.00 $\pm$ 0.00 | 6-6   |
| LOF <sub>E</sub> | 90.94 $\pm$ 0.13 | 0.71  | 0.00 $\pm$ 0.00 | 0-0   | 60.86 $\pm$ 0.22      | 1.06  | 3.00 $\pm$ 0.00 | 3-3   |
| FE               | 82.18 $\pm$ 0.13 | 0.73  | 5.00 $\pm$ 0.00 | 5-5   | 87.02 $\pm$ 0.15      | 0.70  | 0.00 $\pm$ 0.00 | 0-0   |

Table 11: DTACC results for the OOD detection instability caused by close-set train-test splits. Additional results for experiments reported in Table 5 of the main paper.

| MobileNet with closed set ACC = $74.98 \pm 0.50$ |                   |       |                        |       |                         |       |                        |       |
|--------------------------------------------------|-------------------|-------|------------------------|-------|-------------------------|-------|------------------------|-------|
| Method                                           | CIFAR-100 vs SVHN |       |                        |       | CIFAR-100 vs CIFAR-10   |       |                        |       |
|                                                  | mean $\pm$ std    | delta | Rank<br>mean $\pm$ std | range | DTACC<br>mean $\pm$ std | delta | Rank<br>mean $\pm$ std | range |
| KNN                                              | 67.32 $\pm$ 2.49  | 7.25  | 5.40 $\pm$ 1.02        | 3-6   | 59.99 $\pm$ 1.18        | 3.99  | 4.40 $\pm$ 0.49        | 4-5   |
| Mah                                              | 70.69 $\pm$ 4.78  | 16.17 | 4.20 $\pm$ 1.47        | 2-6   | 55.32 $\pm$ 1.61        | 5.77  | 6.00 $\pm$ 0.00        | 6-6   |
| ML                                               | 78.77 $\pm$ 7.22  | 23.14 | 1.80 $\pm$ 1.47        | 0-4   | 76.02 $\pm$ 6.91        | 16.36 | 0.50 $\pm$ 0.50        | 0-1   |
| MSP                                              | 76.31 $\pm$ 8.34  | 23.58 | 3.10 $\pm$ 2.07        | 0-6   | 75.65 $\pm$ 8.32        | 19.07 | 1.40 $\pm$ 0.92        | 0-2   |
| LOF <sub>C</sub>                                 | 76.61 $\pm$ 2.72  | 8.41  | 2.10 $\pm$ 1.30        | 0-4   | 62.56 $\pm$ 2.77        | 8.18  | 3.00 $\pm$ 0.00        | 3-3   |
| LOF <sub>E</sub>                                 | 73.28 $\pm$ 4.43  | 14.76 | 2.80 $\pm$ 1.60        | 0-5   | 60.18 $\pm$ 2.42        | 6.80  | 4.60 $\pm$ 0.49        | 4-5   |
| FE                                               | 78.96 $\pm$ 7.14  | 23.09 | 1.60 $\pm$ 1.62        | 0-5   | 75.92 $\pm$ 6.79        | 16.15 | 1.10 $\pm$ 0.70        | 0-2   |

  

| ResNet with closed set ACC = $94.41 \pm 0.24$ |                  |       |                        |       |                         |       |                        |       |
|-----------------------------------------------|------------------|-------|------------------------|-------|-------------------------|-------|------------------------|-------|
| Method                                        | CIFAR-10 vs SVHN |       |                        |       | CIFAR-10 vs CIFAR-100   |       |                        |       |
|                                               | mean $\pm$ std   | delta | Rank<br>mean $\pm$ std | range | DTACC<br>mean $\pm$ std | delta | Rank<br>mean $\pm$ std | range |
| KNN                                           | 80.03 $\pm$ 2.88 | 10.99 | 2.10 $\pm$ 1.51        | 0-5   | 75.50 $\pm$ 3.59        | 11.70 | 3.80 $\pm$ 0.40        | 3-4   |
| Mah                                           | 79.33 $\pm$ 1.95 | 5.31  | 3.20 $\pm$ 1.66        | 0-5   | 76.32 $\pm$ 2.52        | 7.80  | 3.20 $\pm$ 0.40        | 3-4   |
| ML                                            | 79.69 $\pm$ 2.77 | 9.31  | 2.20 $\pm$ 0.75        | 1-3   | 81.61 $\pm$ 0.36        | 1.00  | 1.10 $\pm$ 0.54        | 0-2   |
| MSP                                           | 80.80 $\pm$ 2.13 | 8.06  | 1.00 $\pm$ 1.10        | 0-3   | 81.66 $\pm$ 0.28        | 0.96  | 1.00 $\pm$ 1.00        | 0-2   |
| LOF <sub>C</sub>                              | 75.32 $\pm$ 4.03 | 14.74 | 4.60 $\pm$ 1.28        | 1-6   | 70.79 $\pm$ 4.34        | 13.53 | 5.00 $\pm$ 0.00        | 5-5   |
| LOF <sub>E</sub>                              | 69.69 $\pm$ 3.24 | 12.47 | 5.90 $\pm$ 0.30        | 5-6   | 62.76 $\pm$ 4.39        | 14.16 | 6.00 $\pm$ 0.00        | 6-6   |
| FE                                            | 79.68 $\pm$ 2.78 | 9.33  | 2.00 $\pm$ 1.41        | 0-4   | 81.61 $\pm$ 0.36        | 1.04  | 0.90 $\pm$ 0.83        | 0-2   |

Table 12: TNR at TPR 95% results for the OOD detection instability caused by close-set train-test splits. Additional results for experiments reported in Table 5 of the main paper.

| MobileNet with closed set ACC = 74.98±0.50 |                   |       |           |       |                       |       |           |       |
|--------------------------------------------|-------------------|-------|-----------|-------|-----------------------|-------|-----------|-------|
| Method                                     | CIFAR-100 vs SVHN |       |           |       | CIFAR-100 vs CIFAR-10 |       |           |       |
|                                            | TNR               |       | Rank      |       | TNR                   |       | Rank      |       |
|                                            | mean±std          | delta | mean±std  | range | mean±std              | delta | mean±std  | range |
| KNN                                        | 11.23±5.80        | 20.39 | 5.60±0.92 | 3-6   | 6.88±0.68             | 2.70  | 3.70±0.90 | 3-5   |
| Mah                                        | 22.90±12.50       | 41.89 | 3.70±1.68 | 0-5   | 4.72±0.80             | 2.67  | 5.90±0.30 | 5-6   |
| ML                                         | 40.71±22.76       | 61.53 | 1.80±1.54 | 0-4   | 34.28±23.12           | 53.71 | 0.00±0.00 | 0-0   |
| MSP                                        | 35.93±21.27       | 54.64 | 3.50±1.50 | 2-6   | 32.91±22.71           | 53.42 | 1.80±0.40 | 1-2   |
| LOF <sub>C</sub>                           | 35.74±9.92        | 29.41 | 2.00±1.41 | 0-4   | 7.04±1.79             | 5.24  | 4.10±0.94 | 3-6   |
| LOF <sub>E</sub>                           | 25.73±11.94       | 36.14 | 2.90±1.45 | 1-5   | 6.39±1.14             | 3.96  | 4.30±0.64 | 3-5   |
| FE                                         | 41.30±22.76       | 61.75 | 1.50±1.86 | 0-6   | 33.68±22.95           | 53.34 | 1.20±0.40 | 1-2   |

  

| ResNet with closed set ACC = 94.41±0.24 |                  |       |           |       |                       |       |           |       |
|-----------------------------------------|------------------|-------|-----------|-------|-----------------------|-------|-----------|-------|
| Method                                  | CIFAR-10 vs SVHN |       |           |       | CIFAR-10 vs CIFAR-100 |       |           |       |
|                                         | TNR              |       | Rank      |       | TNR                   |       | Rank      |       |
|                                         | mean±std         | delta | mean±std  | range | mean±std              | delta | mean±std  | range |
| KNN                                     | 31.91±7.03       | 24.53 | 2.60±1.80 | 0-5   | 28.32±6.16            | 20.02 | 3.60±0.66 | 2-4   |
| Mah                                     | 36.49±5.37       | 18.39 | 1.80±1.47 | 0-4   | 29.78±4.56            | 14.73 | 3.20±0.40 | 3-4   |
| ML                                      | 34.03±5.03       | 15.67 | 1.60±0.80 | 0-3   | 45.84±0.98            | 3.17  | 0.90±0.30 | 0-1   |
| MSP                                     | 30.91±2.51       | 8.81  | 3.80±1.17 | 2-6   | 35.62±1.17            | 3.83  | 2.20±0.60 | 2-4   |
| LOF <sub>C</sub>                        | 28.52±10.85      | 30.70 | 3.60±2.20 | 0-6   | 22.45±6.38            | 18.43 | 5.00±0.00 | 5-5   |
| LOF <sub>E</sub>                        | 19.78±7.09       | 20.81 | 5.80±0.40 | 5-6   | 14.77±3.85            | 11.76 | 6.00±0.00 | 6-6   |
| FE                                      | 34.01±5.30       | 16.92 | 1.80±1.33 | 0-4   | 46.42±0.82            | 2.51  | 0.10±0.30 | 0-1   |

Table 13: AUPR results for the OOD detection instability caused by close-set train-test splits. Additional results for experiments reported in Table 5 of the main paper.

| MobileNet with closed set ACC = 74.98±0.50 |                   |       |           |       |                       |       |           |       |
|--------------------------------------------|-------------------|-------|-----------|-------|-----------------------|-------|-----------|-------|
| Method                                     | CIFAR-100 vs SVHN |       |           |       | CIFAR-100 vs CIFAR-10 |       |           |       |
|                                            | AUPR              |       | Rank      |       | AUPR                  |       | Rank      |       |
|                                            | mean±std          | delta | mean±std  | range | mean±std              | delta | mean±std  | range |
| KNN                                        | 70.41±4.32        | 13.14 | 5.30±1.19 | 3-6   | 60.64±1.21            | 4.22  | 4.40±0.49 | 4-5   |
| Mah                                        | 76.12±6.71        | 23.14 | 4.00±1.84 | 0-6   | 55.18±2.15            | 7.25  | 6.00±0.00 | 6-6   |
| ML                                         | 84.32±7.30        | 23.05 | 1.90±1.45 | 0-4   | 81.07±6.98            | 16.55 | 0.40±0.49 | 0-1   |
| MSP                                        | 82.00±7.70        | 22.49 | 3.40±1.62 | 2-6   | 80.61±7.79            | 18.30 | 1.40±0.92 | 0-2   |
| LOF <sub>C</sub>                           | 84.01±3.74        | 10.84 | 2.00±1.41 | 0-4   | 64.33±3.37            | 9.98  | 3.00±0.00 | 3-3   |
| LOF <sub>E</sub>                           | 79.07±6.06        | 19.76 | 2.90±1.30 | 1-4   | 61.37±2.88            | 7.97  | 4.60±0.49 | 4-5   |
| FE                                         | 84.52±7.35        | 23.10 | 1.50±1.96 | 0-5   | 80.94±6.96            | 16.40 | 1.20±0.60 | 0-2   |
| ResNet with closed set ACC = 94.41±0.24    |                   |       |           |       |                       |       |           |       |
| Method                                     | CIFAR-10 vs SVHN  |       |           |       | CIFAR-10 vs CIFAR-100 |       |           |       |
|                                            | AUPR              |       | Rank      |       | AUPR                  |       | Rank      |       |
|                                            | mean±std          | delta | mean±std  | range | mean±std              | delta | mean±std  | range |
| KNN                                        | 85.64±3.30        | 12.28 | 1.60±1.85 | 0-5   | 80.76±4.47            | 13.86 | 3.80±0.40 | 3-4   |
| Mah                                        | 86.26±2.14        | 6.20  | 1.70±1.49 | 0-4   | 81.74±3.54            | 11.27 | 3.20±0.40 | 3-4   |
| ML                                         | 85.15±2.80        | 8.44  | 2.40±0.80 | 1-4   | 87.73±0.61            | 1.78  | 1.00±0.00 | 1-1   |
| MSP                                        | 85.74±2.44        | 9.23  | 2.20±1.66 | 0-5   | 86.80±0.47            | 1.84  | 2.00±0.00 | 2-2   |
| LOF <sub>C</sub>                           | 81.40±4.77        | 16.08 | 4.20±1.89 | 0-6   | 76.07±5.16            | 15.95 | 5.00±0.00 | 5-5   |
| LOF <sub>E</sub>                           | 74.88±4.04        | 14.09 | 5.90±0.30 | 5-6   | 66.05±5.96            | 18.92 | 6.00±0.00 | 6-6   |
| FE                                         | 85.10±2.81        | 8.50  | 3.00±0.89 | 1-4   | 87.78±0.60            | 1.77  | 0.00±0.00 | 0-0   |

Table 14: DTACC results for the OOD detection instability caused by different augmentation methods used for close model training. Additional results for experiments reported in Table 6 of the main paper.

| Augmentation                    | ACC   | KNN          | Mah          | ML           | MSP          | LOF <sub>C</sub> | LOF <sub>E</sub> | FE           |
|---------------------------------|-------|--------------|--------------|--------------|--------------|------------------|------------------|--------------|
| MobileNet CIFAR-100 vs SVHN     |       |              |              |              |              |                  |                  |              |
| None                            | 53.73 | 66.25        | 72.72        | 69.83        | 65.33        | <b>74.52</b>     | 72.76            | 70.27        |
| Affine                          | 74.41 | 71.52        | 75.14        | 70.45        | 70.27        | 75.70            | <b>78.31</b>     | 70.39        |
| CoarseDropout                   | 67.18 | 60.19        | 63.25        | 77.18        | 71.20        | 74.05            | 67.96            | <b>77.75</b> |
| ColorJitter                     | 65.98 | 60.59        | 62.54        | 75.07        | 68.76        | <b>77.47</b>     | 73.00            | 75.77        |
| CropAndPad                      | 72.59 | 63.02        | 70.89        | 77.12        | 74.16        | <b>78.31</b>     | 74.45            | 77.29        |
| MixUp                           | 68.65 | 63.30        | <b>78.87</b> | 71.24        | 70.38        | 78.70            | 78.15            | 69.80        |
| MobileNet CIFAR-100 vs CIFAR-10 |       |              |              |              |              |                  |                  |              |
| None                            | 53.73 | 56.07        | 53.81        | <b>62.74</b> | 62.19        | 56.76            | 51.29            | 62.56        |
| Affine                          | 74.41 | 60.15        | 56.33        | <b>72.52</b> | 70.91        | 64.25            | 60.15            | 72.51        |
| CoarseDropout                   | 67.18 | 59.42        | 56.02        | <b>67.16</b> | 66.87        | 59.96            | 55.65            | 67.15        |
| ColorJitter                     | 65.98 | 58.22        | 56.76        | <b>67.40</b> | 66.50        | 62.33            | 57.38            | 67.31        |
| CropAndPad                      | 72.59 | 60.57        | 56.23        | <b>70.25</b> | 69.37        | 62.40            | 58.84            | 70.06        |
| MixUp                           | 68.65 | 59.47        | 56.20        | <b>68.70</b> | 68.16        | 55.34            | 57.07            | 67.23        |
| ResNet CIFAR-10 vs SVHN         |       |              |              |              |              |                  |                  |              |
| None                            | 83.64 | 71.41        | 67.70        | <b>74.43</b> | 73.87        | 74.15            | 69.59            | 74.41        |
| Affine                          | 94.76 | <b>86.45</b> | 83.97        | 85.24        | 84.40        | 84.83            | 81.62            | 85.23        |
| CoarseDropout                   | 89.27 | 62.52        | 59.39        | 81.27        | 80.31        | 64.89            | 72.69            | <b>81.28</b> |
| ColorJitter                     | 87.98 | 80.35        | 70.02        | 77.99        | 78.00        | <b>82.09</b>     | 80.31            | 77.93        |
| CropAndPad                      | 94.01 | 84.79        | 80.48        | 87.02        | 85.14        | 83.11            | 79.55            | <b>87.06</b> |
| MixUp                           | 89.41 | 77.28        | 81.31        | 57.10        | <b>83.12</b> | 72.72            | 78.72            | 50.43        |
| ResNet CIFAR-10 vs CIFAR-100    |       |              |              |              |              |                  |                  |              |
| None                            | 83.64 | 63.20        | 62.25        | 74.41        | 72.67        | 57.95            | 54.94            | <b>74.44</b> |
| Affine                          | 94.76 | 81.31        | 80.25        | <b>83.07</b> | 82.62        | 79.84            | 77.84            | 83.05        |
| CoarseDropout                   | 89.27 | 58.27        | 55.08        | 78.65        | 77.41        | 54.14            | 54.10            | <b>78.69</b> |
| ColorJitter                     | 87.98 | 74.48        | 71.70        | 77.50        | 76.17        | 74.64            | 71.78            | <b>77.50</b> |
| CropAndPad                      | 94.01 | 79.84        | 77.35        | 81.99        | 81.72        | 76.09            | 72.06            | <b>82.01</b> |
| MixUp                           | 89.41 | 62.93        | 66.61        | 72.72        | <b>76.77</b> | 60.33            | 57.22            | 67.73        |

Table 15: TNR at TPR 95% results for the OOD detection instability caused by different augmentation methods used for close model training. Additional results for experiments reported in Table 6 of the main paper.

| Augmentation                    | ACC   | KNN   | Mah          | ML           | MSP          | LOF <sub>C</sub> | LOF <sub>E</sub> | FE           |
|---------------------------------|-------|-------|--------------|--------------|--------------|------------------|------------------|--------------|
| MobileNet CIFAR-100 vs SVHN     |       |       |              |              |              |                  |                  |              |
| None                            | 53.73 | 12.47 | <b>31.45</b> | 13.11        | 11.28        | 24.10            | 28.72            | 12.87        |
| Affine                          | 74.41 | 28.78 | 33.28        | 11.84        | 13.83        | 30.81            | <b>41.14</b>     | 9.93         |
| CoarseDropout                   | 67.18 | 5.10  | 10.09        | 26.34        | 20.82        | 25.26            | 12.80            | <b>28.50</b> |
| ColorJitter                     | 65.98 | 4.16  | 10.52        | 22.22        | 18.21        | <b>39.95</b>     | 25.39            | 23.19        |
| CropAndPad                      | 72.59 | 8.77  | 21.19        | 23.35        | 20.32        | <b>35.89</b>     | 29.84            | 23.09        |
| MixUp                           | 68.65 | 8.72  | <b>40.35</b> | 10.10        | 13.73        | 35.25            | 38.45            | 7.78         |
| MobileNet CIFAR-100 vs CIFAR-10 |       |       |              |              |              |                  |                  |              |
| None                            | 53.73 | 4.22  | 4.77         | <b>11.15</b> | 10.32        | 4.26             | 3.29             | 10.73        |
| Affine                          | 74.41 | 6.06  | 4.59         | <b>19.65</b> | 19.35        | 7.59             | 5.09             | 18.96        |
| CoarseDropout                   | 67.18 | 5.19  | 5.12         | <b>14.84</b> | 14.45        | 6.48             | 5.15             | 14.36        |
| ColorJitter                     | 65.98 | 5.66  | 6.17         | <b>13.73</b> | 13.14        | 9.91             | 5.82             | 13.50        |
| CropAndPad                      | 72.59 | 6.58  | 4.58         | <b>17.92</b> | 16.32        | 6.98             | 5.90             | 17.43        |
| MixUp                           | 68.65 | 6.68  | 5.26         | 14.62        | <b>15.83</b> | 4.94             | 5.65             | 13.19        |
| ResNet CIFAR-10 vs SVHN         |       |       |              |              |              |                  |                  |              |
| None                            | 83.64 | 25.14 | 26.36        | 16.21        | 15.69        | <b>39.94</b>     | 26.22            | 15.74        |
| Affine                          | 94.76 | 51.16 | 47.07        | 54.64        | 38.62        | 51.35            | 34.75            | <b>55.50</b> |
| CoarseDropout                   | 89.27 | 0.10  | 5.92         | <b>32.08</b> | 23.34        | 10.31            | 26.32            | 31.95        |
| ColorJitter                     | 87.98 | 41.32 | 15.55        | 23.76        | 22.63        | <b>54.33</b>     | 46.30            | 23.03        |
| CropAndPad                      | 94.01 | 47.77 | 43.02        | 61.05        | 41.01        | 53.79            | 35.88            | <b>62.23</b> |
| MixUp                           | 89.41 | 32.63 | <b>55.88</b> | 7.73         | 35.98        | 19.50            | 43.04            | 3.70         |
| ResNet CIFAR-10 vs CIFAR-100    |       |       |              |              |              |                  |                  |              |
| None                            | 83.64 | 10.77 | 11.80        | 22.91        | 17.63        | 11.39            | 7.54             | <b>23.23</b> |
| Affine                          | 94.76 | 39.08 | 39.33        | 47.28        | 35.74        | 39.87            | 36.48            | <b>48.26</b> |
| CoarseDropout                   | 89.27 | 6.09  | 9.00         | 33.23        | 23.39        | 7.53             | 6.90             | <b>33.50</b> |
| ColorJitter                     | 87.98 | 22.85 | 19.93        | 29.16        | 21.77        | 27.42            | 22.02            | <b>30.12</b> |
| CropAndPad                      | 94.01 | 38.73 | 35.15        | 46.50        | 34.21        | 33.88            | 26.85            | <b>46.87</b> |
| MixUp                           | 89.41 | 8.67  | 13.36        | <b>31.88</b> | 29.22        | 9.73             | 7.68             | 31.14        |

Table 16: AUPR results for the OOD detection instability caused by different augmentation methods used for close model training. Additional results for experiments reported in Table 6 of the main paper.

| Augmentation                    | ACC   | KNN          | Mah          | ML           | MSP          | LOF <sub>C</sub> | LOF <sub>E</sub> | FE           |
|---------------------------------|-------|--------------|--------------|--------------|--------------|------------------|------------------|--------------|
| MobileNet CIFAR-100 vs SVHN     |       |              |              |              |              |                  |                  |              |
| None                            | 53.73 | 70.10        | <b>79.54</b> | 73.90        | 69.96        | 79.46            | 78.17            | 74.31        |
| Affine                          | 74.41 | 78.77        | 82.64        | 74.01        | 74.72        | 83.09            | <b>86.26</b>     | 73.33        |
| CoarseDropout                   | 67.18 | 61.15        | 66.26        | 83.01        | 77.49        | 80.46            | 71.51            | <b>83.81</b> |
| ColorJitter                     | 65.98 | 60.91        | 65.98        | 80.69        | 75.03        | <b>84.37</b>     | 78.94            | 81.41        |
| CropAndPad                      | 72.59 | 65.89        | 76.56        | 82.31        | 79.87        | <b>85.33</b>     | 81.15            | 82.36        |
| MixUp                           | 68.65 | 66.55        | <b>86.10</b> | 74.14        | 74.85        | 85.40            | 85.45            | 71.32        |
| MobileNet CIFAR-100 vs CIFAR-10 |       |              |              |              |              |                  |                  |              |
| None                            | 53.73 | 56.72        | 54.17        | 65.31        | <b>65.77</b> | 56.58            | 49.59            | 65.07        |
| Affine                          | 74.41 | 60.38        | 56.31        | <b>77.79</b> | 76.70        | 66.11            | 60.79            | 77.63        |
| CoarseDropout                   | 67.18 | 60.59        | 56.35        | 71.03        | <b>71.29</b> | 61.06            | 55.98            | 70.83        |
| ColorJitter                     | 65.98 | 58.05        | 57.53        | <b>71.15</b> | 70.87        | 65.25            | 58.27            | 70.99        |
| CropAndPad                      | 72.59 | 61.61        | 56.33        | <b>75.11</b> | 74.58        | 64.20            | 59.46            | 74.98        |
| MixUp                           | 68.65 | 61.07        | 56.90        | 72.59        | <b>72.81</b> | 55.52            | 57.94            | 70.77        |
| ResNet CIFAR-10 vs SVHN         |       |              |              |              |              |                  |                  |              |
| None                            | 83.64 | 78.25        | 73.42        | 78.52        | 78.04        | <b>81.72</b>     | 74.36            | 78.39        |
| Affine                          | 94.76 | <b>92.07</b> | 90.60        | 91.47        | 89.71        | 91.23            | 86.77            | 91.59        |
| CoarseDropout                   | 89.27 | 58.34        | 59.88        | <b>86.43</b> | 84.49        | 66.94            | 76.27            | 86.40        |
| ColorJitter                     | 87.98 | 88.18        | 75.01        | 82.39        | 82.52        | <b>90.64</b>     | 88.00            | 82.15        |
| CropAndPad                      | 94.01 | 91.22        | 88.14        | 92.88        | 90.21        | 90.77            | 86.24            | <b>93.04</b> |
| MixUp                           | 89.41 | 81.64        | <b>87.96</b> | 51.87        | 87.24        | 76.64            | 85.32            | 38.94        |
| ResNet CIFAR-10 vs CIFAR-100    |       |              |              |              |              |                  |                  |              |
| None                            | 83.64 | 66.50        | 65.28        | 79.92        | 77.49        | 61.49            | 56.09            | <b>80.03</b> |
| Affine                          | 94.76 | 87.56        | 87.04        | 89.06        | 88.06        | 85.98            | 83.93            | <b>89.12</b> |
| CoarseDropout                   | 89.27 | 57.26        | 53.67        | 84.87        | 82.39        | 55.65            | 53.88            | <b>84.92</b> |
| ColorJitter                     | 87.98 | 80.17        | 77.21        | 83.50        | 81.39        | 80.44            | 76.04            | <b>83.61</b> |
| CropAndPad                      | 94.01 | 86.64        | 84.53        | 87.90        | 86.90        | 83.12            | 78.72            | <b>87.98</b> |
| MixUp                           | 89.41 | 65.40        | 69.89        | 73.66        | <b>79.85</b> | 62.45            | 59.04            | 68.80        |

Table 17: DTACC, TNR, and AUPR results for the OOD detection instability caused by the different random seeds used during training for text classification by BERT model. Additional results to those presented in Table 7 of the main paper.

| BERT with closed set ACC = 97.49±0.11 |                |       |           |       |
|---------------------------------------|----------------|-------|-----------|-------|
| Method                                | DTACC          |       | Rank      |       |
|                                       | mean±std       | delta | mean±std  | range |
| KNN                                   | 72.10±4.16     | 11.34 | 2.25±1.85 | 0-5   |
| Mah                                   | 70.75±2.21     | 7.46  | 2.75±2.17 | 0-6   |
| ML                                    | 69.08±4.90     | 16.39 | 3.38±2.12 | 0-6   |
| MSP                                   | 67.60±7.66     | 21.69 | 3.62±2.34 | 0-6   |
| LOF <sub>C</sub>                      | 70.98±3.14     | 10.93 | 2.12±1.45 | 0-5   |
| LOF <sub>E</sub>                      | 70.74±3.08     | 10.75 | 3.00±1.22 | 1-5   |
| FE                                    | 69.06±4.90     | 16.39 | 3.88±1.90 | 1-6   |
|                                       | TNR at TPR 95% |       | Rank      |       |
|                                       | mean±std       | delta | mean±std  | range |
| KNN                                   | 28.26±4.28     | 13.16 | 1.50±1.22 | 0-3   |
| Mah                                   | 28.07±2.87     | 8.84  | 2.00±0.87 | 1-3   |
| ML                                    | 17.97±3.23     | 9.68  | 4.62±0.48 | 4-5   |
| MSP                                   | 16.85±2.05     | 5.26  | 5.25±0.97 | 4-6   |
| LOF <sub>C</sub>                      | 29.68±3.27     | 9.26  | 1.00±0.87 | 0-2   |
| LOF <sub>E</sub>                      | 28.61±3.60     | 9.95  | 1.50±1.22 | 0-3   |
| FE                                    | 17.88±3.43     | 9.68  | 5.12±0.78 | 4-6   |
|                                       | AUPR           |       | Rank      |       |
|                                       | mean±std       | delta | mean±std  | range |
| KNN                                   | 73.85±4.15     | 11.79 | 1.00±1.32 | 0-3   |
| Mah                                   | 73.21±2.13     | 6.48  | 2.00±1.50 | 0-5   |
| ML                                    | 67.03±5.07     | 16.64 | 4.88±0.60 | 4-6   |
| MSP                                   | 65.62±7.33     | 22.60 | 5.25±1.39 | 2-6   |
| LOF <sub>C</sub>                      | 73.36±2.86     | 9.04  | 1.25±0.97 | 0-3   |
| LOF <sub>E</sub>                      | 72.82±2.79     | 8.72  | 2.25±0.97 | 1-4   |
| FE                                    | 67.07±5.08     | 16.80 | 4.38±0.86 | 3-6   |
